# Supplementary material
Source: HighWire-hosted journal article supplement (https://bmjopen.bmj.com/content/11/4/e044487)
Supplement: inline-supplementary-material-2 [file inline-supplementary-material-2.pdf]

**APPENDIX B**

\* Each row will be its own separate index card, and will be given to the participant collectively to sort

Medical Doctor / Diagnosing Medical Provider

Athletic Trainer

Student's Coach

Counseling and Psychological Services

Student's Academic Advisor

Campus Disability Services

Professor

Campus Police

Parent/Guardian

Student
